# Supplementary material for: First Molecular Evidence of Seewis Virus in Croatia
Source: MDPI journal article supplement (doi:10.3390/life13122359), 2023-12-18
Supplement: s1 [file s1]

Supplementary Table 1. Oligonucleotides for SWSV S, M, and L segment amplification.

| Genomic target        | Oligonucleotide name | Oligonucleotide sequence   | Reference            |
|-----------------------|----------------------|----------------------------|----------------------|
| <b>SWSV S segment</b> | SWSV-22-fw           | GCATACTACGAAACAGAGAGC      | Schlegel et al. 2012 |
|                       | SWSV-22-962F         | TGGGTMTTYGCRGGWGCACCTGA    | Schlegel et al. 2012 |
|                       | SWSV 3'end           | TAGTAGTAKRCTCCYTRAARAG     | Schlegel et al. 2012 |
|                       | SWSV1590R            | GTG TTT GAG GTA KTG GAG TG | Schlegel et al. 2012 |
|                       | BESS1090R            | ACAGTCTTTGATGCRATRATGG     | Radosa et al. 2013   |
|                       | SWSV S455R           | TAAGCAAGATGGTGTCTACG       | <b>This study</b>    |
| <b>SWSV M segment</b> | BESM-12F             | TCCGCAAGAAAAAGCCACAT       | Radosa et al. 2013   |
|                       | OSV697F              | GGACCAGGTGCADCTTGTGAAGC    | Song et al. 2007     |
|                       | MR685709             | GCTTTAGWAATYAAAAACAATSTAC  | Ling et al. 2014     |
|                       | BESM-1225R           | GCTTCACAGGATGCACCAGGGC     | Radosa et al. 2013   |
|                       | TM 1485R             | CCAGCCAAARCARAATGT         | Song et al. 2007     |
| <b>SWSV L segment</b> | HAN-L-F1             | ATGTAYGTBAGTGCWGATGC       | Klempa et al. 2006   |
|                       | HAN-L-F2             | TGCWGATGCHACIAARTGGTC      | Klempa et al. 2006   |
|                       | HAN-L-R1             | AACCADTCWGTYYCRTCATC       | Klempa et al. 2006   |
|                       | HAN-L-R2             | GCRTCRTCWGARTGRTGDGCAA     | Klempa et al. 2006   |
