# Supplementary figures and images for: First Molecular Evidence of Seewis Virus in Croatia
Source: MDPI journal article supplement (doi:10.3390/life13122359), 2023-12-18

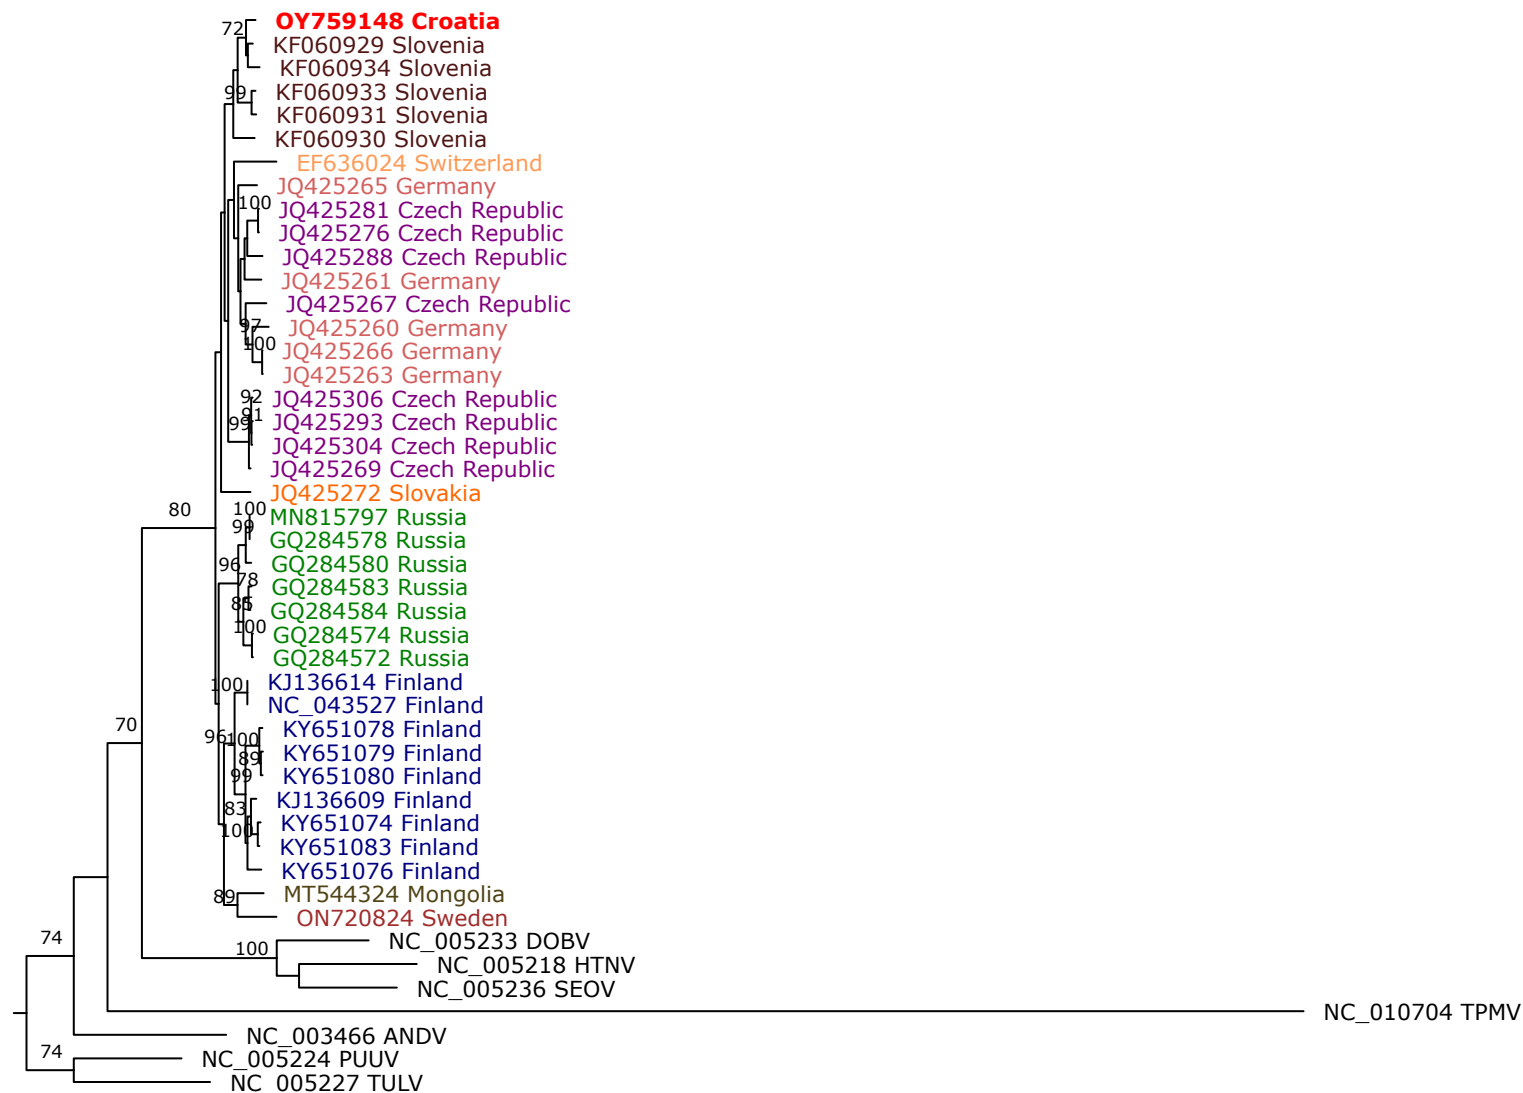

0.5

Supplement: s1 [file s1]

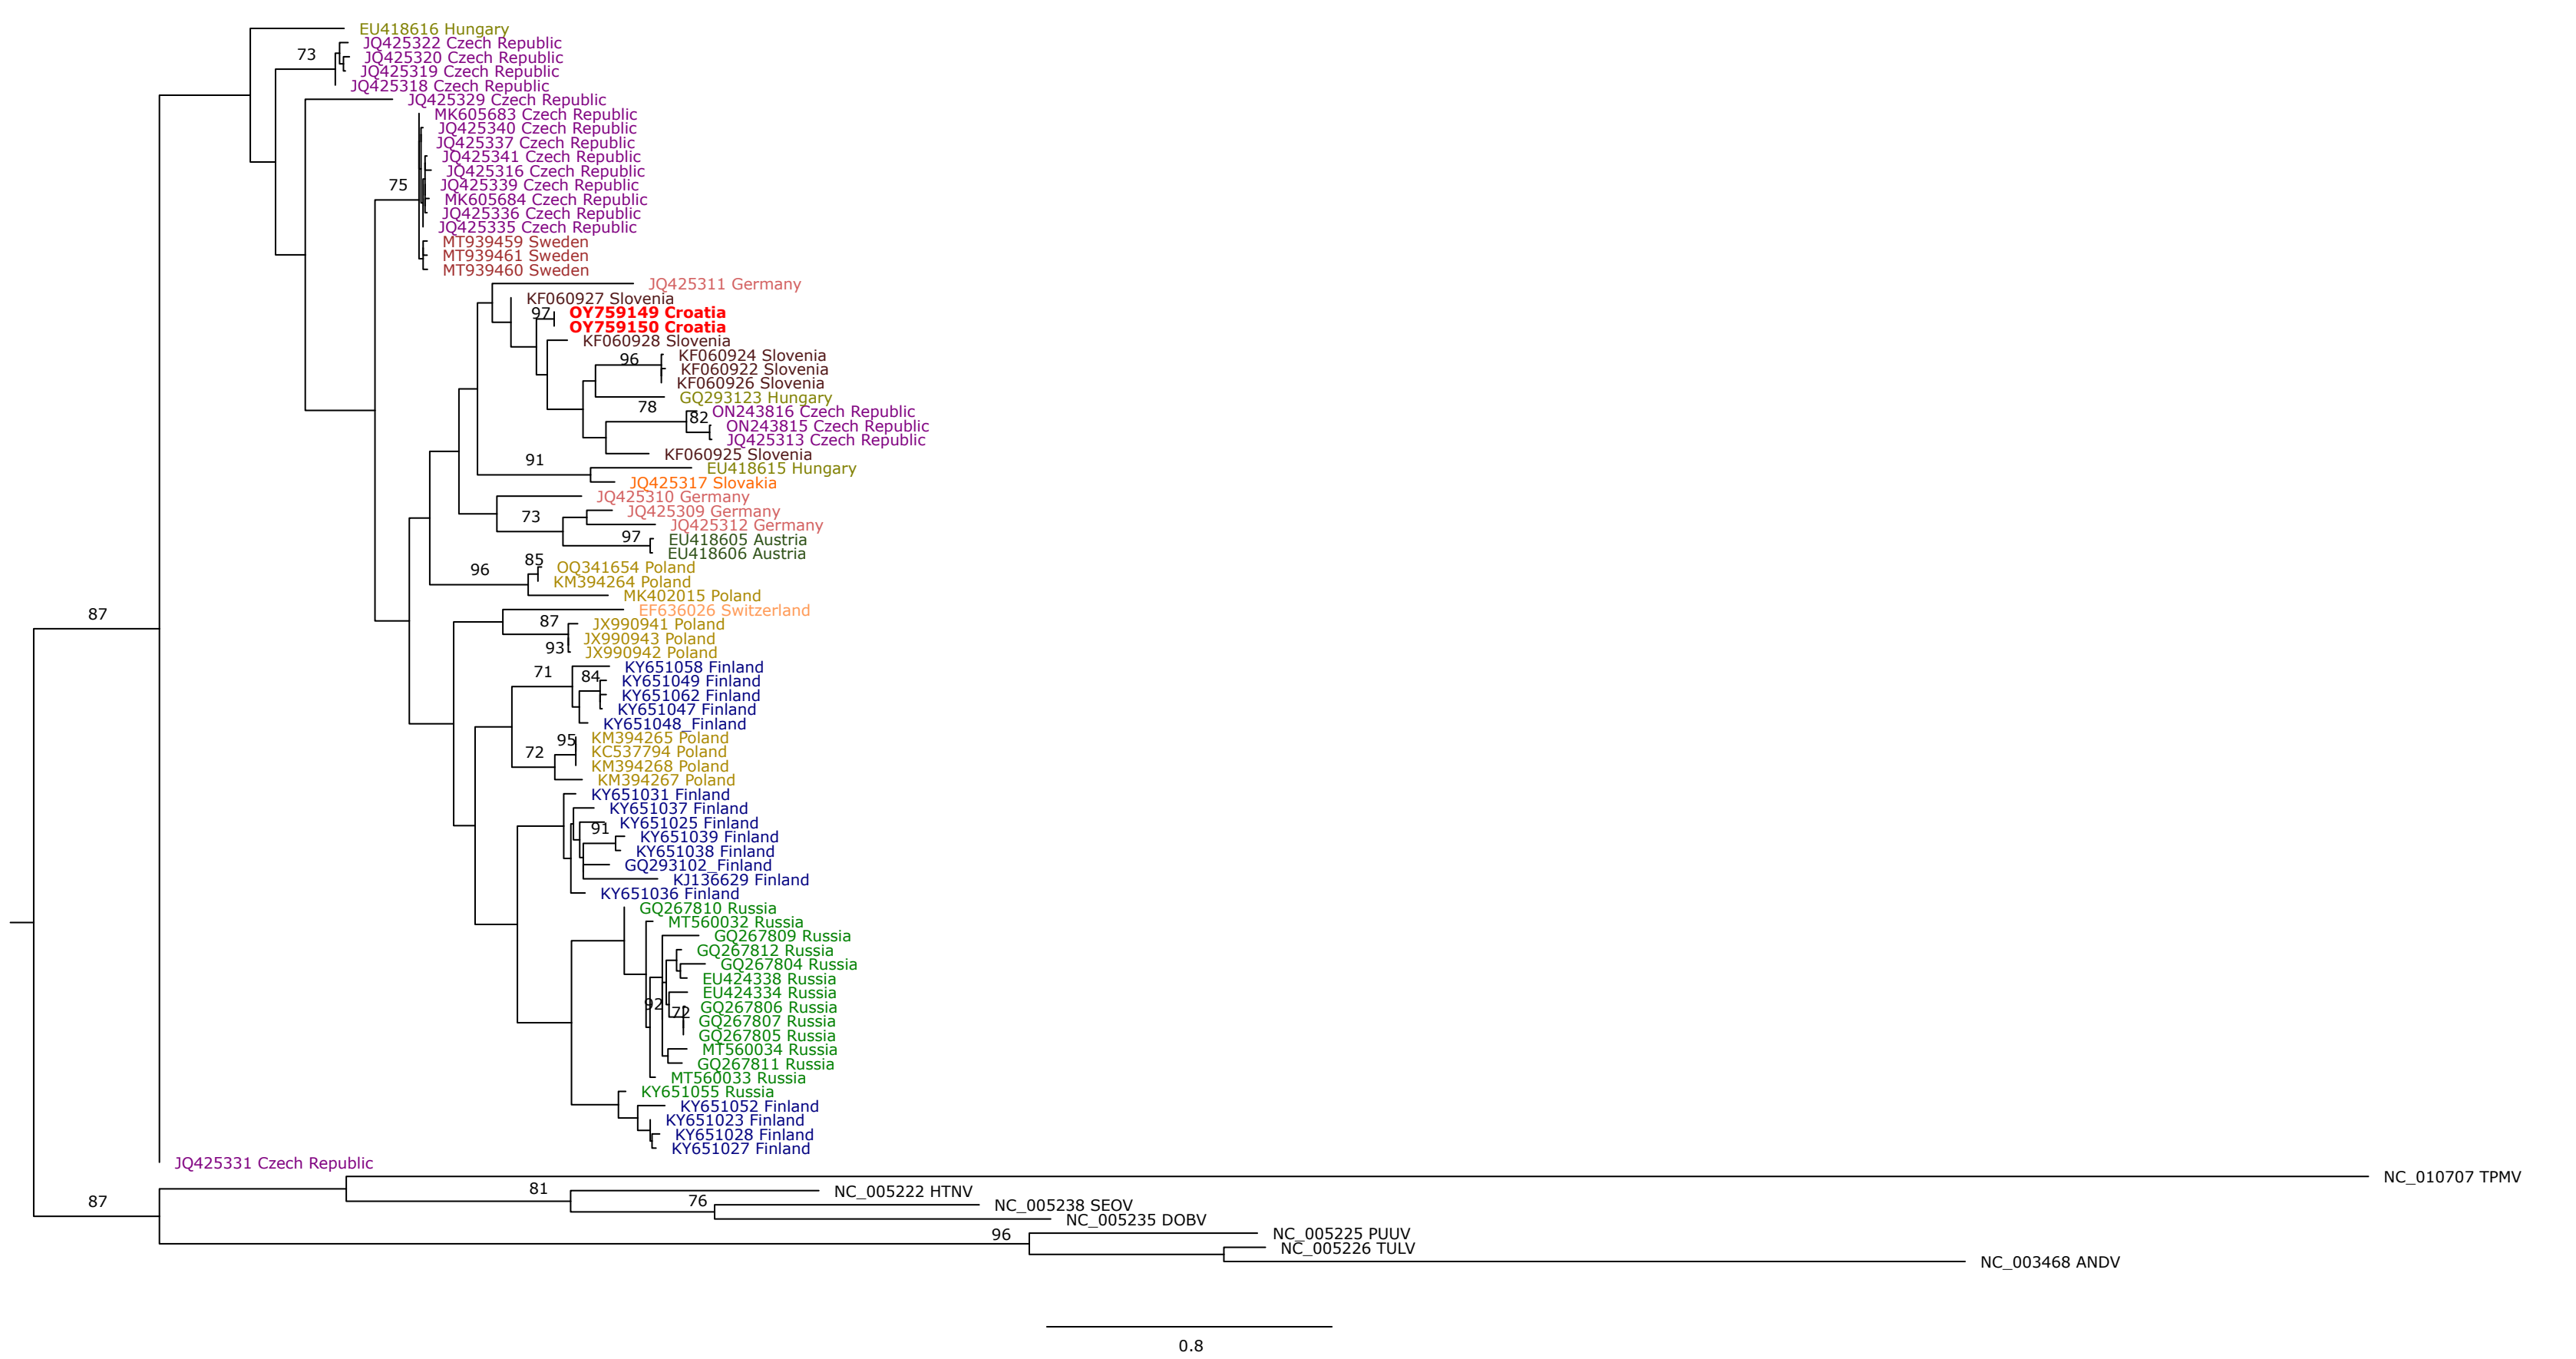

Supplement: s1 [file s1]

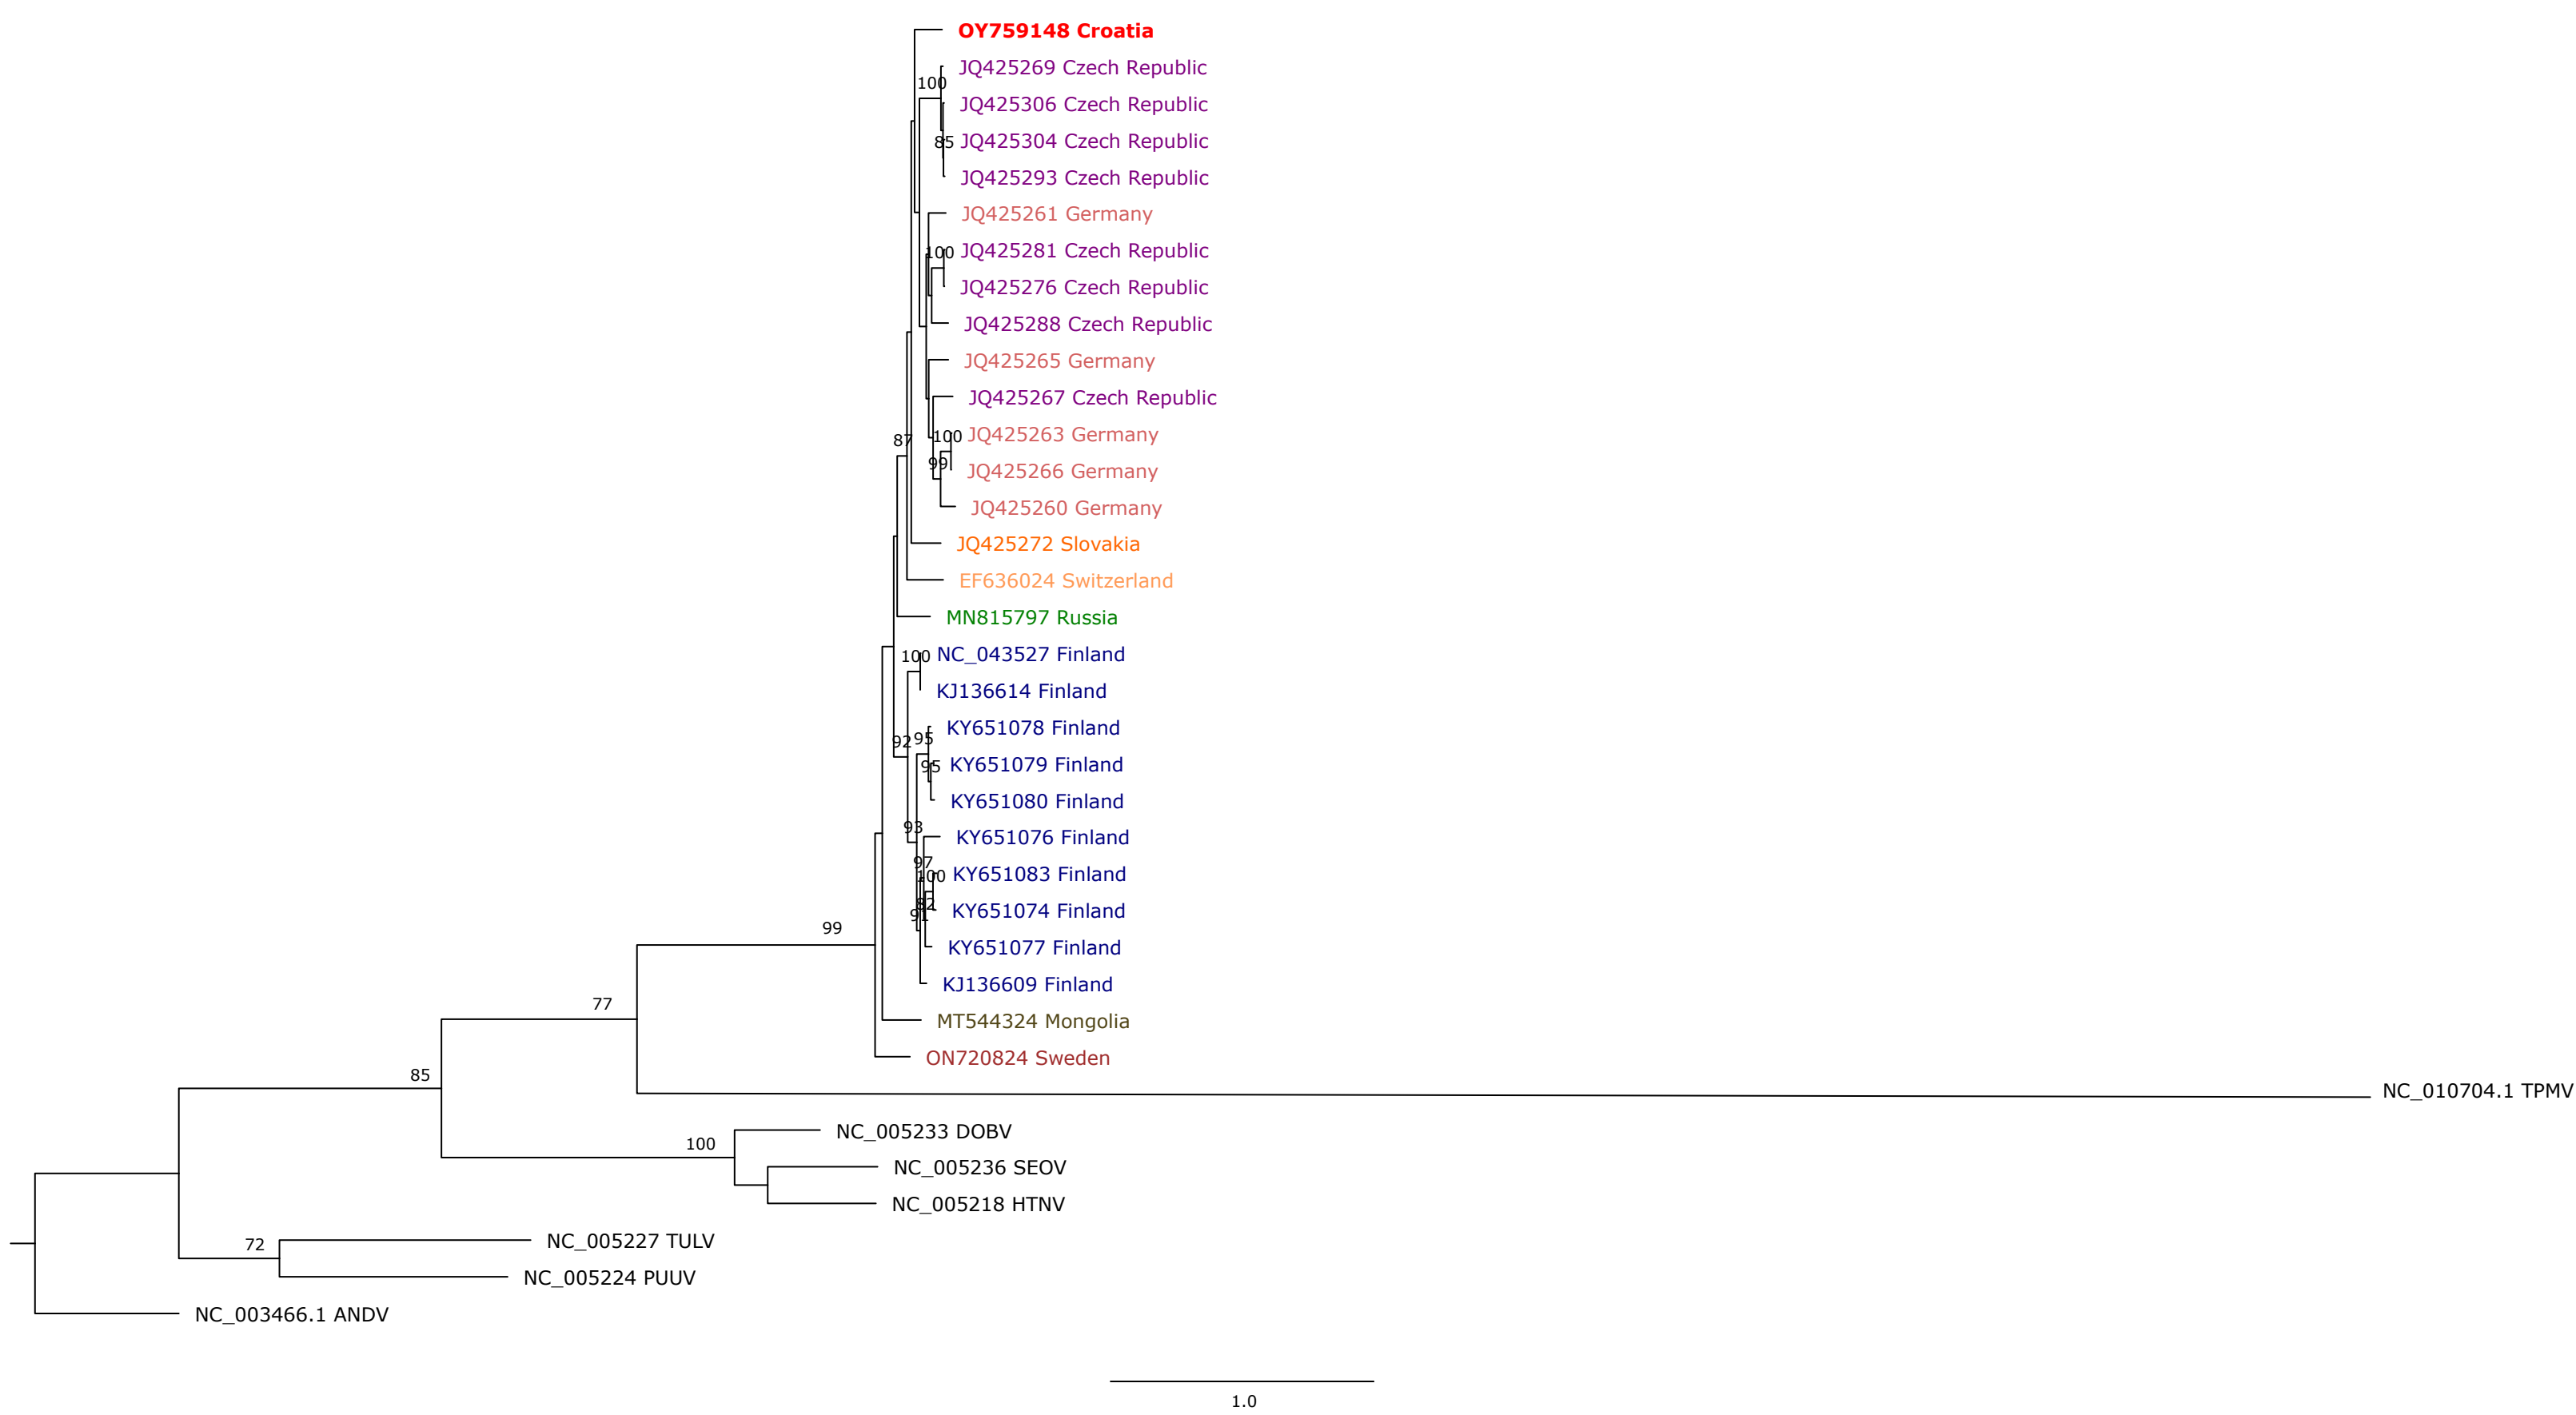

Supplement: s1 [file s1]
